# Supplementary material for: Virus adaptation to heparan sulfate comes with capsid stability tradeoff
Source: eLife. 2024 Dec 23;13:e98441. doi: 10.7554/eLife.98441 (PMC11717363; doi:10.7554/eLife.98441)
Supplement: Figure 1—figure supplement 1—source data 1. [file elife-98441-fig1-figsupp1-data1.xlsx]

## Sheet: Sheet1
LDH assay						MTT assay
HCQ [μM]	Vero					HCQ [μM]	Vero
0.78125	3.61962	4.52994	6.17719	3.01273		0.78125	101.103	103.757	104.749	109.96
1.5625	5.09347	8.53969	3.66296	2.92604		1.5625	97.6344	92.5554	108.535	111.764
3.125	4.20482	6.56733	0.49851	-0.7586		3.125	109.472	115.356	109.437	116.832
6.25	4.48659	2.90436	0.801951	1.17041		6.25	119.571	98.5489	115.447	121.969
12.5	0.715253	0.130046	0.780276	0.021674		12.5	121.777	142.779	122.681	128.323
25	2.47087	-0.47684	2.55757	2.73097		25	116.082	109.78	116.068	105.823
50	2.51422	3.03441	5.61365	4.03143		50	97.1076	86.3135	121.003	123.273
BafA1 [nM]	Vero					BAF-A1 [nM]	Vero
7.8125	0.671905	2.27581	8.30127	8.3663		7.8125	100.987	82.6707	102.102	86.2843
15.625	-1.84232	-2.12409	5.48361	5.0718		15.625	107.287	93.3096	89.4134	89.3659
31.25	-2.12409	-2.23246	0.411813	2.51422		31.25	91.0269	85.2413	95.4934	91.2837
62.5	-0.86697	-0.13005	3.74966	3.2078		62.5	86.2558	81.7316	93.0412	82.0924
125	-1.27879	-1.25711	1.21376	1.23544		125	93.0902	94.5983	76.9742	86.4268
250	-2.23246	-0.39014	1.32214	3.09943		250	88.6139	91.87	74.0055	84.604
500	-1.21376	0.693579	6.56733	5.98212		500	89.416	90.499	89.9656	86.694
