# Supplementary material for: Virus adaptation to heparan sulfate comes with capsid stability tradeoff
Source: eLife. 2024 Dec 23;13:e98441. doi: 10.7554/eLife.98441 (PMC11717363; doi:10.7554/eLife.98441)
Supplement: Figure 1—figure supplement 1—source data 2. [file elife-98441-fig1-figsupp1-data2.xlsx]

## Sheet: Sheet1
HCQ
Pic. No		area	mean	min	max		red/green
1	blue	262144	13.592	0	255		0.552345
	green	262144	13.43	0	255
	red	262144	7.418	0	255
2	blue	262144	27.783	0	255		0.329992
	green	262144	16.761	0	255
	red	262144	5.531	0	255
4	blue	262144	17.352	0	255		0.42637
	green	262144	20.121	0	255
	red	262144	8.579	0	255
BAF
Pic. No		area	mean	min	max		red/green
1	blue	262144	7.713	0	255		0.146489
	green	262144	16.718	0	255
	red	262144	2.449	0	255
2	blue	262144	13.626	0	255		0.154724
	green	262144	18.045	0	255
	red	262144	2.792	0	255
3	blue	262144	15.14	0	255		0.138399
	green	262144	16.662	0	255
	red	262144	2.306	0	255
