# Supplementary material for: Virus adaptation to heparan sulfate comes with capsid stability tradeoff
Source: eLife. 2024 Dec 23;13:e98441. doi: 10.7554/eLife.98441 (PMC11717363; doi:10.7554/eLife.98441)
Supplement: Figure 1—figure supplement 1—source data 3. [file elife-98441-fig1-figsupp1-data3.xlsx]

## Sheet: Sheet1
	Rep 1 20240731								Rep 2 20240801									Rep 3 20240802
	1		2						1		2						1		2
	CT	quantity	CT	quantity	AVG	RCN/ml	%		CT	quantity	CT	quantity	AVG	RCN/ml	%		CT	quantity	CT	quantity	AVG	RCN/ml	%
MP4-97R/167G	16.4462	81436784	17.1291	47495560	64466172	25786468800	100		15.9588	119670032	15.6839	148683392	134176712	53670684800	100		16.3565	87416472	16.7223	65484820	76450646	30580258400	100
MP4-97R/167G + HCQ	15.0753	240421280	15.4577	177755104	209088192	83635276800	324.338		15.021	250956992	14.9306	269526144	260241568	104096627200	193.954		14.9708	261099072	15.0986	236028144	248563608	99425443200	325.13
MP4-97R/167G BAF-A1	15.0617	243008192	15.0847	238640560	240824376	96329750400	373.567		14.3773	417203328	15.0765	240183488	328693408	131477363200	244.971		17.5418	77016984	17.2279	101403456	89210220	35684088000	327.485
MP4	15.9284	122575832	16.7167	65777312	94176572	37670628800	100		15.3612	191825632	15.4114	184371072	188098352	75239340800	100		16.1496	102933248	16.2887	92227584	97580416	39032166400	100
MP4+ HCQ	21.4146	1.61061e+06	21.6732	1.31315e+06	1.46188e+06	584752200	1.55228		19.7844	5.83505e+06	19.6776	6.34865e+06	6.09185e+06	2436739000	3.23865		20.7534	2.71478e+06	20.7835	2.651e+06	2.68289e+06	1.07316e+09	2.74942
MP4 BAF-A1	19.2292	9045883	19.5294	7136838	8.09136e+06	3236544200	8.59169		17.4455	36994868	17.6731	30910382	33952625	13581050000	18.0505		19.7573	11051604	20.246	7201445	9.12652e+06	3650609800	8.1104
