# Supplementary material for: Virus adaptation to heparan sulfate comes with capsid stability tradeoff
Source: eLife. 2024 Dec 23;13:e98441. doi: 10.7554/eLife.98441 (PMC11717363; doi:10.7554/eLife.98441)
Supplement: Figure 1—figure supplement 1—source data 4. [file elife-98441-fig1-figsupp1-data4.xlsx]

## Sheet: Sheet1
LDH assay						MTT assay
HCQ [μM]	RD					HCQ [μM]	RD
0.78125	8.67068	7.04873	10.8333	9.26539		0.78125	96.9238	121.908	102.302	98.3671
1.5625	3.55252	2.74155	4.07515	5.60699		1.5625	91.2286	117.981	109.235	103.877
3.125	10.4548	7.62542	4.70591	6.02149		3.125	86.6574	109.401	114.732	107.514
6.25	10.7792	5.37271	5.24656	6.99466		6.25	88.8606	133.508	117.299	117.627
12.5	18.3844	19.4296	6.7784	9.66187		12.5	87.6541	100.873	126.068	113.759
25	16.4741	19.3756	5.49886	3.66065		25	103.99	99.0146	116.739	62.5049
50	17.285	16.3839	7.76959	0.741141		50	110.93	109.071	77.1733	62.3468
BafA1 [nM]	RD					BAF-A1 [nM]	RD
7.8125	6.09358	9.3555	-5.24205	-6.25127		7.8125	100.034	85.1033	117.538	115.829
15.625	8.45442	10.4728	-6.32335	-6.80994		15.625	79.6486	84.5663	129.932	135.486
31.25	5.01228	7.55333	-6.93609	-8.16156		31.25	86.4883	89.118	137.766	111.826
62.5	6.45401	8.07596	-5.47634	-6.28731		62.5	88.4347	94.8656	114.016	124.995
125	9.30143	10.0764	-6.10709	-6.48555		125	76.4636	80.0085	109.839	116.68
250	15.8974	11.9867	-4.34097	-2.97132		250	88.3554	99.3807	115.844	103.157
500	19.0151	13.2482	-2.01617	-2.39463		500	88.0991	90.1126	111.871	100.892
