# Supplementary material for: Virus adaptation to heparan sulfate comes with capsid stability tradeoff
Source: eLife. 2024 Dec 23;13:e98441. doi: 10.7554/eLife.98441 (PMC11717363; doi:10.7554/eLife.98441)
Supplement: Figure 1—figure supplement 1—source data 5. [file elife-98441-fig1-figsupp1-data5.xlsx]

## Sheet: Sheet1
HCQ								BAF-A1
Concentration (µM)	MP4 97R-167G			MP4				Concentration (nM)	MP4 97R-167G			MP4
	Rep1	Rep2		Rep1	Rep2				Rep1	Rep2		Rep1	Rep2
0	111.245	88.7548		86.2738	113.726			0	110.501	89.4992		77.7136	122.286
0.78125	155.845	132.684		132.307	121.946			7.8125	100.849	73.7853		90.5072	99.9166
1.5625	194.83	174.244		104.671	130.8			15.625	109.453	78.3067		91.1608	98.9216
3.125	248.563	166.467		104.997	131.914			31.25	124.898	85.2688		74.6064	90.9771
6.25	289.133	210.775		78.9606	98.3339			62.5	130.785	113.81		66.0187	61.217
12.5	329.962	204.659		76.9797	76.0196			125	161.596	95.7956		50.2614	43.8283
25	384.55	260.559		47.2741	56.1343			250	157.966	109.025		28.479	18.0865
