# Supplementary material for: Virus adaptation to heparan sulfate comes with capsid stability tradeoff
Source: eLife. 2024 Dec 23;13:e98441. doi: 10.7554/eLife.98441 (PMC11717363; doi:10.7554/eLife.98441)
Supplement: Figure 1—figure supplement 2—source data 1. [file elife-98441-fig1-figsupp2-data1.xlsx]

## Sheet: Fig S2
	Rep 1			Rep 2			Rep 3
	RNA copy number	avg RNA copy number	%SCARB2 KO/control cells	RNA copy number	avg RNA copy number	%SCARB2 KO/control cells	RNA copy number	avg RNA copy number	%SCARB2 KO/control cells
MP4-97R/167G	20093326	34863245	100	17100990	28644930	100	5808329	12209091	100
MP4-97R/167G	14769919			11543940			6400762
MP4-97R/167G SCARB2 KO	360719	648756	1.86086	558003	1.13154e+06	3.95022	92685.2	126166	1.03338
MP4-97R/167G SCARB2 KO	288036			573535			33480.9
MP4	1.59444e+06	3.76531e+06	100	365325	673243	100	152989	195595	100
MP4	2.17087e+06			307918			42606.8
MP4 SCARB2 KO	75147.7	136800	3.63317	12384	33968.5	5.0455	3611.15	4262.51	2.17925
MP4 SCARB2 KO	61652.3			21584.4			651.361
