# Supplementary material for: Virus adaptation to heparan sulfate comes with capsid stability tradeoff
Source: eLife. 2024 Dec 23;13:e98441. doi: 10.7554/eLife.98441 (PMC11717363; doi:10.7554/eLife.98441)
Supplement: Figure 1—source data 1. [file elife-98441-fig1-data1.xlsx]

## Sheet: Sheet1
Combine triplicates
HCQ											BAF-A1
MP4-97R/167G					MP4						MP4-97R/167G					MP4
Concentration	% Positive Cells	Average % positive cells	Average % positive cells normalised to untreated		Concentration	% Positive Cells	Average % positive cells	Average % positive cells normalised to untreated			Concentration	% Positive Cells	Average % positive cells	Average % positive cells normalised to untreated		Concentration	% Positive Cells	Average % positive cells	Average % positive cells normalised to untreated
0	5.99224	9.91002	60.4665		0	8.66773	7.97443	108.694			0	12.1098	11.7156	103.365		0	7.71821	7.0612	109.305
	8.89621		89.7698			4.94586		62.0215				12.3077		105.054			6.41246		90.8127
	14.8416		149.764			10.3097		129.284				10.7293		91.581			7.05293		99.8828
0.78125	8.39686	14.1994	84.7311		0.78125	10.5521	11.8658	132.324			7.8125	11.6684	14.5758	99.5977		7.8125	10.2029	9.74751	144.492
	19.495		196.72			16.0162		200.844				19.3655		165.297			7.7431		109.657
	14.7064		148.399			9.02905		113.225				12.6933		108.345			11.2966		159.981
1.5625	9.75227	18.8279	98.4082		1.5625	9.97155	7.97291	125.044			15.625	9.61393	15.5743	82.0611		15.625	8.85087	8.01343	125.345
	28.1502		284.058			7.26571		91.1126				22.1206		188.814			6.55435		92.8221
	18.5812		187.499			6.68149		83.7864				14.9883		127.934			8.63506		122.289
3.125	9.66016	22.7829	97.4788		3.125	9.38091	4.89378	117.637			31.25	11.5873	19.5856	98.905		31.25	9.71644	12.8723	137.603
	37.1103		374.473			2.83416		35.5406				28.6063		244.174			8.39958		118.954
	21.5781		217.74			2.46627		30.9272				18.5632		158.448			20.5008		290.33
6.25	15.4264	23.4889	155.665		6.25	8.27148	3.32585	103.725			62.5	14.5954	20.7843	124.581		62.5	9.43053	9.68985	133.554
	25.1282		253.564			0.993927		12.4639				28.286		241.439			11.0361		156.292
	29.9121		301.837			0.712149		8.93041				19.4715		166.202			8.60291		121.834
12.5	18.7873	28.7835	189.579		12.5	4.86191	2.06561	60.9687			125	17.5516	25.8747	149.814		125	9.13205	10.7524	129.327
	36.6064		369.388			0.519101		6.50957				35.8615		306.101			12.6919		179.741
	30.9568		312.379			0.81581		10.2303				24.2109		206.656			10.4334		147.756
25	25.8687	33.7753	261.036		25	2.24093	1.20257	28.1014			250	19.9882	30.3994	170.612		250	6.43494	6.34175	91.1309
	46.1078		465.265			0.487949		6.11892				41.3716		353.133			7.22068		102.259
	29.3494		296.158			0.878846		11.0208				29.8383		254.689			5.36962		76.044
