# Supplementary material for: Virus adaptation to heparan sulfate comes with capsid stability tradeoff
Source: eLife. 2024 Dec 23;13:e98441. doi: 10.7554/eLife.98441 (PMC11717363; doi:10.7554/eLife.98441)
Supplement: Figure 1—source data 2. [file elife-98441-fig1-data2.xlsx]

## Sheet: Sheet1
Heparinase
Rep 1						Rep 2						Rep 3
Virus	condition	% Positive Cells	avg % positive cells	% relative to untreated		Virus	condition	% Positive Cells	avg % positive cells	% relative to untreated		Virus	condition	% Positive Cells	avg % positive cells	% relative to untreated
MP4-97R/167G	untreated	24.9521	28.6639	100		MP4-97R/167G	untreated	23.922	21.1348	100		MP4-97R/167G	untreated	9.93377	13.8361	100
		32.3756						18.3476						17.7384
	hepIII	20.8662	20.1739	70.3812			hepIII	12.2705	12.3224	58.3036			hepIII	9.04645	9.04645	65.383
		19.4817						12.3742						13.3929
	HCQ	52.51	50.4713	176.08			HCQ	61.3596	56.8251	268.87			HCQ	23.3645	20.2537	146.383
		48.4326						52.2905						17.1429
	hepIII + HCQ	29.1629	33.5917	117.192			hepIII + HCQ	34.3415	30.8336	145.89			hepIII + HCQ	15.9468	15.6657	113.224
		38.0204						27.3256						15.3846
MP4	untreated	58.5575	58.9237	100		MP4	untreated	46.3356	40.7956	100		MP4	untreated	31.0204	35.442	100
		59.29						35.2556						39.8636
	hepIII	49.9605	50.657	85.9703			hepIII	37.0722	37.0722	90.873			hepIII	26.3566	26.0788	73.5816
		51.3534						13.6709						25.801
	HCQ	24.5871	24.5069	41.591			HCQ	26.6772	24.0108	58.8563			HCQ	10.7658	10.7168	30.2374
		24.4268						21.3444						10.6677
	hepIII + HCQ	22.0401	23.5296	39.9322			hepIII + HCQ	16.7289	15.7273	38.5515			hepIII + HCQ	12.931	13.2022	37.2502
		25.019						14.7257						13.4734
SC
Rep 1						Rep 2						Rep 3
Virus	condition	% Positive Cells	avg % positive cells	% relative to untreated		Virus	condition	% Positive Cells	avg % positive cells	% relative to untreated		Virus	condition	% Positive Cells	avg % positive cells	% relative to untreated
MP4-97R/167G	untreated	30.5896	28.9672	100		MP4-97R/167G	untreated	27.8672	29.0913	100		MP4-97R/167G	untreated	24.2117	22.9899	100
		27.3448						30.3153						21.7681
	SC	11.4382	11.0878	38.2771			SC	15.502	16.1599	55.549			SC	7.55947	7.20378	31.3345
		10.7374						16.8178						6.84809
	HCQ	70.6052	68.1489	235.262			HCQ	44.7293	50.2784	172.83			HCQ	43.038	37.5302	163.247
		65.6927						55.8275						32.0225
	SC + HCQ	39.4892	35.551	122.729			SC + HCQ	34.7197	38.1058	130.987			SC + HCQ	20.3911	18.3727	79.9164
		31.6129						41.4918						16.3543
MP4	untreated	70.1606	71.3499	100		MP4	untreated	61.3841	62.3053	100		MP4	untreated	38.6899	39.88	100
		72.5392						63.2266						41.0702
	SC	66.6378	66.6378	93.3958			SC	70.8284	73.2765	117.609			SC	51.3752	47.3685	118.778
		67.9917						75.7245						43.3619
	HCQ	30.2109	32.0027	44.8531			HCQ	31.3288	33.4641	53.7098			HCQ	11.5737	14.1049	35.3683
		33.7944						35.5994						16.6361
	SC + HCQ	17.3218	21.5528	30.2073			SC + HCQ	44.7177	46.0282	73.8752			SC + HCQ	13.0561	11.5792	29.0351
		25.7839						47.3387						10.1023
