# Supplementary material for: Virus adaptation to heparan sulfate comes with capsid stability tradeoff
Source: eLife. 2024 Dec 23;13:e98441. doi: 10.7554/eLife.98441 (PMC11717363; doi:10.7554/eLife.98441)
Supplement: Figure 2—source data 1. [file elife-98441-fig2-data1.xlsx]

## Sheet: Sheet1
20220305								20220308							20220316
Rep 1								Rep 2							Rep 3
		Ct	Quantity	RCN/ml	Relative to inoculum					Ct	Quantity	RCN/ml	Relative to inoculum				Ct	Quantity	RCN/ml	Relative to inoculum
Vero MP4-97R/167G	Inoculum	17.9273	288933	115573100				Vero MP4-97R/167G	Inoculum	17.4909	376718	150687150			Vero MP4-97R/167G	Inoculum	17.507	375632	150252650
	Mock	21.1239	41384.5	1.65538e+07	14.3232				Mock	21.2345	38691.5	1.54766e+07	10.2707			Mock	21.0754	41517.3	1.66069e+07	11.0527
	Mock	21.157	40560.1	1.6224e+07	14.0379				Mock	21.1052	41855.6	1.67422e+07	11.1106			Mock	20.6655	53469.4	2.13878e+07	14.2345
	HCQ	22.1141	22667	9.06679e+06	7.84507				HCQ	20.7998	50396.2	2.01585e+07	13.3777			HCQ	21.1471	39721.1	1.58884e+07	10.5745
	HCQ	21.7154	28883.8	1.15535e+07	9.99671				HCQ	20.8929	47622.4	1.9049e+07	12.6414			HCQ	20.652	53916.2	2.15665e+07	14.3535
Vero MP4	Inoculum	19.4674	113286	4.53146e+07				Vero MP4	Inoculum	17.7714	317646	127058600			Vero MP4	Inoculum	17.5459	366724	1.46689e+08
	Mock	23.6738	8782.02	3.51281e+06	7.75205				Mock	22.5419	17476.6	6.99062e+06	5.50189			Mock	22.6104	16097.9	6.43915e+06	4.38965
	Mock	24.2743	6096.06	2.43842e+06	5.3811				Mock	22.6404	16461	6.58439e+06	5.18217			Mock	22.7441	14823.2	5.92929e+06	4.04207
	HCQ	24.0507	6984.04	2.79362e+06	6.16494				HCQ	22.3534	19598	7.83921e+06	6.16976			HCQ	22.443	17850.8	7.14031e+06	4.86764
	HCQ	24.4015	5642.55	2.25702e+06	4.98078				HCQ	24.2612	6145.01	2.458e+06	1.93454			HCQ	22.5733	16471	6.58838e+06	4.49138
		Rep 1	Rep 2	Rep3
MP4-97R/167G	Mock	1.63889e+07	1.61094e+07	1.89974e+07
	HCQ	10310150	1.96037e+07	1.87275e+07
MP4	Mock	2.97562e+06	6.78751e+06	6.18422e+06
	HCQ	2.52532e+06	5.14861e+06	6.86435e+06
