# Supplementary material for: Virus adaptation to heparan sulfate comes with capsid stability tradeoff
Source: eLife. 2024 Dec 23;13:e98441. doi: 10.7554/eLife.98441 (PMC11717363; doi:10.7554/eLife.98441)
Supplement: Figure 2—source data 2. [file elife-98441-fig2-data2.xlsx]

## Sheet: Sheet1
20230921 rep 1								20230922 rep 2								20230927 rep 3
		Untreated		Treated						Untreated		Treated						Untreated		Treated
		Ct	Quantity	Ct	Quantity					Ct	Quantity	Ct	Quantity					Ct	Quantity	Ct	Quantity
MP4-97R/167G	Inoculum	16.9797	3.77168e+06					MP4-97R/167G	Inoculum	17.1297	3.35623e+06					MP4-97R/167G	Inoculum	17.2224	3478701
	0	23.9782	16297	24.2219	13482.5				0	24.3324	12371.5	26.7711	1855.75				0	24.7548	11083.9	24.4495	13991.9
	2	21.991	76468.8	21.634	100946				2	22.3417	58207.8	26.3266	2622.44				2	22.9203	44952.7	22.5264	60717.4
	4	22.4709	52644	22.6606	45420.4				4	23.2138	29536.8	26.402	2472.92				4	23.24	35219.5	22.5021	61854.9
	6	18.6862	1.00002e+06	18.3112	1.33869e+06				6	20.2949	286088	21.9019	81952.4				6	17.5228	2.76587e+06	16.2904	7084931
	8	14.7971	20603276	13.5553	54134288				8	14.7849	20799428	16.8034	4.32605e+06				8	13.875	44767328	12.7543	105306704
MP4	Inoculum	17.3695	2785049					MP4	Inoculum	17.4717	2.57224e+06					MP4	Inoculum	17.5789	2649924
	0	26.6114	2101.25	25.7838	4000.08				0	24.4463	11322.9	26.3966	2483.49				0	26.7654	2389.05	25.8599	4768.6
	2	25.9841	3423.12	26.3233	2629.16				2	21.9493	78985.9	26.247	2790				2	26.6042	2702	25.6992	5390.5
	4	26.9514	1612.89	26.6708	2006.4				4	22.673	44985.8	27.0419	1503.27				4	27.0312	1950.47	26.0545	4110.24
	6	21.99	76525.2	25.2636	5995.41				6	18.2304	1.4256e+06	25.1264	6670.65				6	21.5334	129563	23.7098	24607.6
	8	16.9237	3.93958e+06	20.4686	249926				8	13.6451	50479748	19.8848	393601				8	16.1405	7943556	19.7102	520956
Calculation RNA copy number (RCN/ml)
20230921 rep 1								20230922 rep 2								20230927 rep 3
		Untreated		Treated						Untreated		Treated						Untreated		Treated
		Ct	Quantity	Ct	Quantity					Ct	Quantity	Ct	Quantity					Ct	Quantity	Ct	Quantity
MP4-97R/167G	Inoculum		1508671000					MP4-97R/167G	Inoculum		1342493300					MP4-97R/167G	Inoculum		1391480400
	0		6.51879e+06		5.39298e+06				0		4.94859e+06		742300				0		4.43356e+06		5.59676e+06
	2		3.05875e+07		4.03785e+07				2		2.32831e+07		1.04898e+06				2		17981075		2.4287e+07
	4		2.10576e+07		1.81682e+07				4		1.18147e+07		989169				4		1.40878e+07		2.4742e+07
	6		400008550		5.35475e+08				6		1.14435e+08		3.2781e+07				6		1106348900		2833972400
	8		8241310400		21653715200				8		8319771200		1730420200				8		17906931200		42122681600
MP4	Inoculum		1114019600					MP4	Inoculum		1028897000					MP4	Inoculum		1.05997e+09
	0		840501		1.60003e+06				0		4.52915e+06		993394				0		955619		1.90744e+06
	2		1.36925e+06		1.05166e+06				2		3.15944e+07		1.116e+06				2		1.0808e+06		2.1562e+06
	4		645156		802560				4		1.79943e+07		601309				4		780189		1.64409e+06
	6		3.06101e+07		2.39816e+06				6		570239700		2.66826e+06				6		5.18254e+07		9.84305e+06
	8		1575832900		9.99705e+07				8		20191899200		157440275				8		3177422400		2.08383e+08
