# Supplementary material for: Virus adaptation to heparan sulfate comes with capsid stability tradeoff
Source: eLife. 2024 Dec 23;13:e98441. doi: 10.7554/eLife.98441 (PMC11717363; doi:10.7554/eLife.98441)
Supplement: Figure 2—source data 3. [file elife-98441-fig2-data3.xlsx]

## Sheet: Sheet1
Rep1							Rep2
Group	Compound	% Positive Cells	avg % cell	FC relative to untreated			Group	Compound	% Positive Cells	avg % cell	FC relative to untreatek
MP4-97R/167G	untreated	27.4494	27.1608	100			MP4-97R/167G	untreated	38.9029	32.1198	100
	untreated	26.8722						untreated	25.3367
	-1	40.8532	40.854	150.415				-1	37.3887	36.9352	114.992
	-1	40.8548						-1	36.4817
	0	50.6363	52.3971	192.914				0	54.1437	46.5579	144.951
	0	54.1578						0	38.972
	1	48.4932	47.5108	174.924				1	38.1874	39.4627	122.861
	1	46.5284						1	40.738
	2	29.7033	30.7174	113.095				2	40.2703	35.3167	109.953
	2	31.7315						2	30.3632
	3	24.9284	25.6406	94.403				3	29.8246	25.6625	79.8964
	3	26.3528						3	21.5005
MP4	untreated	37.3839	35.7391	100			MP4	untreated	37.0177	34.7816	100
	untreated	34.0944						untreated	32.5455
	-1	3.60603	4.22952	11.8344				-1	5.88553	4.41882	12.7045
	-1	4.85302						-1	2.9521
	0	2.66957	2.84599	7.96321				0	2.40357	2.91424	8.37868
	0	3.0224						0	3.42491
	1	10.2297	10.2544	28.6925				1	9.20034	10.6345	30.575
	1	10.2792						1	12.0686
	2	14.7724	15.5192	43.4237				2	14.3888	13.6093	39.1279
	2	16.2661						2	12.8298
	3	13.7977	13.4775	37.7107				3	13.7128	13.9037	39.9744
	3	13.1573						3	14.0947
