# Supplementary material for: Virus adaptation to heparan sulfate comes with capsid stability tradeoff
Source: eLife. 2024 Dec 23;13:e98441. doi: 10.7554/eLife.98441 (PMC11717363; doi:10.7554/eLife.98441)
Supplement: Figure 2—source data 4. [file elife-98441-fig2-data4.xlsx]

## Sheet: Sheet1
	RLU to plot graph
	MP4-97R/167G
	Rep 1		Rep 2		Rep 3
	untreated	HCQ treated	untreated	HCQ treated	untreated	HCQ treated
1	3326	4107	1933	2093	1863	2079
4	5955	9951	2457	2832	2267	2478
8	15743	29888	5809	28233	9490	13905
24	976450	1862299	1496023	1262304	2587561	1475099
	MP4
	Rep 1		Rep 2		Rep 3
1	4317	1160	3294	6107	2391	5353
4	5499	3011	4482	7956	3261	6789
8	9084	16335	31426	34754	6060	17759
24	198151	690061	1263365	1058912	2054037	1654038
