# Supplementary material for: Virus adaptation to heparan sulfate comes with capsid stability tradeoff
Source: eLife. 2024 Dec 23;13:e98441. doi: 10.7554/eLife.98441 (PMC11717363; doi:10.7554/eLife.98441)
Supplement: Figure 2—source data 5. [file elife-98441-fig2-data5.xlsx]

## Sheet: Sheet1
	RLU to plot graph
	MP4-97R/167G
	Rep 1		Rep 2		Rep 3
	untreated	HCQ treated	untreated	HCQ treated	untreated	HCQ treated
1	40118	45000	8599	15775	41205	23335
4	113349	119814	30156	50239	95317	55107
8	1224258	1288824	1061650	1567606	1431922	1542452
24	10696666	20164356	15290769	29162638	13641123	20338584
	MP4
	Rep 1		Rep 2		Rep 3
	untreated	HCQ treated	untreated	HCQ treated	untreated	HCQ treated
1	12222	11937	15275	15542	31267	16559
4	52793	43964	40601	42126	85809	42129
8	146884	73725	1095966	273010	428193	206998
24	5069304	568545	49567914	1750957	13413190	4838841
