# Supplementary material for: Virus adaptation to heparan sulfate comes with capsid stability tradeoff
Source: eLife. 2024 Dec 23;13:e98441. doi: 10.7554/eLife.98441 (PMC11717363; doi:10.7554/eLife.98441)
Supplement: Figure 3—source data 1. [file elife-98441-fig3-data1.xlsx]

## Sheet: Sheet1
Rep 1 20211108									% relative to virus infectivity in dark mock										% relative to virus infectivity in dark mock
		Dark	0	1	2	3	4				Dark avg	Dark	0	1	2	3	4				Dark avg	Dark	0	1	2	3
Group	Compound	% Positive Cells							Group	Compound		% Positive Cells							Group	Compound		% Positive Cells
MP4-97R/167G		24.7811	0.142485	0.531665	12.4378	19.229	18.8867		MP4-97R/167G		24.5921	100.768	0.579392	2.16193	50.5763	78.1916	76.7997		MP4-97R/167G		100	100	0.495274	1.292	56.0964	80.4598
MP4-97R/167G		24.4032	0.101112	0.103794	15.1528	20.3446	26.3006		MP4-97R/167G			99.2317	0.411156	0.422062	61.6164	82.728	106.947		MP4-97R/167G
MP4-97R/167G	HCQ	46.1487	0.0716889	1.3908	39.9683	35.6363	37.5897		MP4-97R/167G	HCQ		187.656	0.291511	5.65546	162.525	144.909	152.852		MP4-97R/167G	HCQ		180.334	0.297931	4.01817	154.406	152.304
MP4-97R/167G	HCQ	42.5474	0.0748463	0.585507	35.9754	39.2735	38.1315		MP4-97R/167G	HCQ		173.012	0.30435	2.38087	146.288	159.699	155.056		MP4-97R/167G	HCQ
MP4		0.965221	0.10713	0.114679	0.162235	0.410822	0.457524		MP4		1.0242	94.2419	10.4599	11.197	15.8402	40.1117	44.6715		MP4		100	100	9.57048	9.22622	18.4907	45.0742
MP4		1.08317	0.0889108	0.07431	0.216527	0.512473	0.271795		MP4			105.758	8.68104	7.25545	21.1412	50.0366	26.5374		MP4
MP4	HCQ	0.404595	0.0884818	0.101169	0.170285	0.283082	0.124515		MP4	HCQ		39.5037	8.63915	9.8779	16.6262	27.6394	12.1573		MP4	HCQ		40.5121	10.8852	10.0258	17.0656	26.3867
MP4	HCQ	0.425252	0.134489	0.104199	0.179285	0.25742	0.343574		MP4	HCQ		41.5206	13.1312	10.1737	17.505	25.1339	33.5457		MP4	HCQ
Rep 2 20211109									% relative to virus infectivity in dark mock										% relative to virus infectivity in dark mock
		Dark	0	1	2	3	4				Dark avg	Dark	0	1	2	3	4				Dark avg	Dark	0	1	2	3
Group	Compound	% Positive Cells							Group	Compound		% Positive Cells							Group	Compound		% Positive Cells
MP4-97R/167G		7.04452	0.142485	0.202618	0.910159	3.51683	5.29957		MP4-97R/167G		7.68218	91.6995	1.85475	2.63751	11.8477	45.7791	68.9852		MP4-97R/167G		100	100	1.58547	3.40398	23.598	57.1242
MP4-97R/167G		8.31984	0.101112	0.320382	2.71553	5.25994	7.72846		MP4-97R/167G			108.301	1.31619	4.17046	35.3484	68.4694	100.602		MP4-97R/167G
MP4-97R/167G	HCQ	12.8537	0.0716889	0.330614	5.72905	11.4927	6.84904		MP4-97R/167G	HCQ		167.318	0.933184	4.30365	74.5758	149.602	89.1549		MP4-97R/167G	HCQ		170.346	0.953734	4.04905	104.593	140.075
MP4-97R/167G	HCQ	13.3188	0.0748463	0.291497	10.341	10.029	10.3719		MP4-97R/167G	HCQ		173.373	0.974285	3.79446	134.61	130.549	135.012		MP4-97R/167G	HCQ
MP4		1.39938	0.10713	0.0330761	0.0731282	0.728745	1.12897		MP4		1.63165	85.765	6.56577	2.02716	4.48187	44.6632	69.1921		MP4		100	100	6.00746	1.64363	8.76876	40.0307
MP4		1.86391	0.0889108	0.0205603	0.213022	0.577573	1.12796		MP4			114.235	5.44915	1.2601	13.0557	35.3982	69.1302		MP4
MP4	HCQ	1.43866	0.0884818	0.0807754	0.231636	0.520833	0.659891		MP4	HCQ		88.1724	5.42286	4.95055	14.1965	31.9207	40.4433		MP4	HCQ		75.8124	6.8327	3.75723	10.172	35.0105
MP4	HCQ	1.03532	0.134489	0.041834	0.100306	0.62166	0.721482		MP4	HCQ		63.4525	8.24254	2.56392	6.14754	38.1002	44.2181		MP4	HCQ
Rep 3 20211117									% relative to virus infectivity in dark mock										% relative to virus infectivity in dark mock
		Dark	0	1	2	3	4				Dark avg	Dark	0	1	2	3	4				Dark avg	Dark	0	1	2	3
Group	Compound	% Positive Cells							Group	Compound		% Positive Cells							Group	Compound		% Positive Cells
MP4-97R/167G		8.17663	0.0413144	0.417801	0.507156	1.65957	5.52739		MP4-97R/167G		8.82104	92.6946	0.468362	4.73641	5.74939	18.8138	62.6614		MP4-97R/167G		100	100	0.663947	2.74211	8.97488	20.0727
MP4-97R/167G		9.46546	0.0758198	0.0659651	1.0762	1.88168	3.81044		MP4-97R/167G			107.305	0.859533	0.747815	12.2004	21.3317	43.1971		MP4-97R/167G
MP4-97R/167G	HCQ	10.9276	0.060081	1.36369	6.86699	7.2059	14.8817		MP4-97R/167G	HCQ		123.881	0.68111	15.4595	77.8478	81.6899	168.707		MP4-97R/167G	HCQ		144.629	0.597045	8.0195	65.501	63.539
MP4-97R/167G	HCQ	14.588	0.0452503	0.0511182	4.68875	4.0037	9.78446		MP4-97R/167G	HCQ		165.377	0.512981	0.579503	53.1541	45.388	110.922		MP4-97R/167G	HCQ
MP4		2.88389	0.0309394	0.0775246	0.167453	0.629964	1.99972		MP4		3.1941	90.288	0.968642	2.42712	5.24257	19.7227	62.6067		MP4		100	100	1.01554	2.92108	3.99573	17.2662
MP4		3.50431	0.0339354	0.10908	0.0878022	0.473037	1.70081		MP4			109.712	1.06244	3.41505	2.74889	14.8097	53.2485		MP4
MP4	HCQ	1.35647	0.0792064	0.0844101	0.143533	0.317492	0.708123		MP4	HCQ		42.468	2.47977	2.64269	4.49369	9.93995	22.1697		MP4	HCQ		36.192	2.07251	2.82732	12.4747	10.8679
MP4	HCQ	0.955545	0.0531895	0.0962049	0.653375	0.376769	0.792772		MP4	HCQ		29.9159	1.66524	3.01196	20.4557	11.7958	24.8199		MP4	HCQ
Rep 4 20230901									% relative to virus infectivity in dark mock										% relative to virus infectivity in dark mock
		Dark	0	1	2	3	4				Dark avg	Dark	0	1	2	3	4				Dark avg	Dark	0	1	2	3
Group	Compound	% Positive Cells							Group	Compound		% Positive Cells							Group	Compound		% Positive Cells
MP4-97R/167G		12.9464	0.389105	1.87245	8.86545	20.0758	24.868		MP4-97R/167G		15.2587	84.846	2.55005	12.2714	58.101	131.57	162.976		MP4-97R/167G		100	100	2.86976	13.465	66.2978	111.035
MP4-97R/167G		17.571	0.48667	2.23672	11.3669	13.8092	22.5991		MP4-97R/167G			115.154	3.18946	14.6587	74.4946	90.5005	148.106		MP4-97R/167G
MP4-97R/167G	HCQ	34.328	0.763359	7.41289	23.3655	45.3347	55.2948		MP4-97R/167G	HCQ		224.973	5.00278	48.5814	153.129	297.107	362.382		MP4-97R/167G	HCQ		235.58	3.55259	47.7495	131.416	273.371
MP4-97R/167G	HCQ	37.5648	0.320798	7.15902	16.7392	38.0909	44.8523		MP4-97R/167G	HCQ		246.186	2.10239	46.9176	109.703	249.634	293.946		MP4-97R/167G	HCQ
MP4		3.24786	0.0881368	0.0990262	1.2648	2.52188	7.23779		MP4		3.24148	100.197	2.71903	3.05497	39.0192	77.8003	223.287		MP4		100	100	3.42896	3.26231	43.3506	75.8748
MP4		3.2351	0.134161	0.112468	1.5456	2.39705	3.42188		MP4			99.8032	4.13888	3.46965	47.6819	73.9492	105.565		MP4
MP4	HCQ	0.226868	0.0313234	0.130421	0.50362	0.546999	1.41145		MP4	HCQ		6.9989	0.96633	4.0235	15.5367	16.875	43.5434		MP4	HCQ		10.0706	0.737578	4.83728	10.0984	13.6487
MP4	HCQ	0.426002	0.0164935	0.183178	0.151057	0.337838	0.585223		MP4	HCQ		13.1422	0.508826	5.65106	4.66012	10.4223	18.0542		MP4	HCQ
Rep 5 20230905									% relative to virus infectivity in dark mock										% relative to virus infectivity in dark mock
		Dark	0	1	2	3	4				Dark avg	Dark	0	1	2	3	4				Dark avg	Dark	0	1	2	3
Group	Compound	% Positive Cells							Group	Compound		% Positive Cells							Group	Compound		% Positive Cells
MP4-97R/167G		72.4571	2.8231	10.7639	53.2229	52.8591	62.2987		MP4-97R/167G		70.4391	102.865	4.00786	15.2811	75.5587	75.0423	88.4434		MP4-97R/167G		100	100	3.81784	14.5228	76.9358	86.72
MP4-97R/167G		68.4211	2.5554	9.69551	55.1629	69.3105	71.8604		MP4-97R/167G			97.1351	3.62781	13.7644	78.3129	98.3978	102.018		MP4-97R/167G
MP4-97R/167G	HCQ	81.4607	4.84461	47.6086	76.4087	84.1232	90.6954		MP4-97R/167G	HCQ		115.647	6.87773	67.5883	108.475	119.427	128.757		MP4-97R/167G	HCQ		123.468	6.27385	58.3389	110.787	127.696
MP4-97R/167G	HCQ	92.4785	3.99388	34.5782	79.6662	95.7731	91.2849		MP4-97R/167G	HCQ		131.289	5.66998	49.0895	113.099	135.966	129.594		MP4-97R/167G	HCQ
MP4		52.417	0.488998	5.07121	28.3327	37.3096	41.5022		MP4		52.0319	100.74	0.939804	9.74635	54.4526	71.7052	79.763		MP4		100	100	0.598543	9.55912	55.89	67.4412
MP4		51.6468	0.133869	4.87637	29.8286	32.8723	49.5339		MP4			99.2599	0.257283	9.37189	57.3275	63.1772	95.1991		MP4
MP4	HCQ	7.57953	0.0629921	0.528525	0.976676	3.13339	3.51759		MP4	HCQ		14.5671	0.121064	1.01577	1.87707	6.02206	6.76045		MP4	HCQ		13.1621	0.21005	0.738053	2.15559	5.40549
MP4	HCQ	6.11748	0.155594	0.239521	1.26651	2.49177	4.10023		MP4	HCQ		11.7572	0.299036	0.460335	2.4341	4.78893	7.88022		MP4	HCQ
																77
Rep 6 20230920									% relative to virus infectivity in dark mock										% relative to virus infectivity in dark mock
		Dark	0	1	2	3	4				Dark avg	Dark	0	1	2	3	4				Dark avg	Dark	0	1	2	3
Group	Compound	% Positive Cells							Group	Compound		% Positive Cells							Group	Compound		% Positive Cells
MP4-97R/167G		57.9018	9.18699	7.83658	22.5734	54.9715	40.3244		MP4-97R/167G		60.0057	96.4939	15.3102	13.0597	37.6188	91.6105	67.201		MP4-97R/167G		100	100	14.7017	11.1297	40.674	89.9911
MP4-97R/167G		62.1095	8.4567	5.5203	26.24	53.028	45.9474		MP4-97R/167G			103.506	14.0932	9.19963	43.7292	88.3717	76.5718		MP4-97R/167G
MP4-97R/167G	HCQ	70.0811	15.6662	19.363	48.408	70.0851	60.728		MP4-97R/167G	HCQ		116.791	26.1079	32.2686	80.6724	116.798	101.204		MP4-97R/167G	HCQ		121.049	27.9577	26.9604	70.4878	114.556
MP4-97R/167G	HCQ	75.1911	17.8862	12.9925	36.1853	67.3948	64.8237		MP4-97R/167G	HCQ		125.307	29.8075	21.6521	60.3032	112.314	108.029		MP4-97R/167G	HCQ
MP4		33.966	0.847458	0.993246	11.5002	24.282	23.5453		MP4		33.4958	101.404	2.53005	2.96529	34.3333	72.4928	70.2934		MP4		100	100	2.26764	2.46735	35.0727	73.7592
MP4		33.0255	0.671665	0.659666	11.9955	25.1304	25.9619		MP4			98.5961	2.00522	1.9694	35.812	75.0256	77.508		MP4
MP4	HCQ	4.10902	0.14241	0.263783	0.87118	3.20473	2.7871		MP4	HCQ		12.2673	0.425158	0.787512	2.60087	9.56757	8.32076		MP4	HCQ		13.6793	0.710371	1.05651	3.13225	8.82061
MP4	HCQ	5.05494	0.333478	0.443989	1.22716	2.70433	2.97719		MP4	HCQ		15.0913	0.995583	1.32551	3.66363	8.07365	8.88826		MP4	HCQ
											2
