# Supplementary material for: Virus adaptation to heparan sulfate comes with capsid stability tradeoff
Source: eLife. 2024 Dec 23;13:e98441. doi: 10.7554/eLife.98441 (PMC11717363; doi:10.7554/eLife.98441)
Supplement: Figure 3—source data 2. [file elife-98441-fig3-data2.xlsx]

## Sheet: Sheet1
2hpi
Rep 1											Rep 2
MP4				MP4-97R/167G							MP4				MP4-97R/167G
Mock		HCQ treated		Mock		HCQ treated					Mock		HCQ treated		Mock		HCQ treated
Pic no.	Manders::Manders	Pic no.	Manders::Manders	Pic no.	Manders::Manders	Pic no.	Manders::Manders				Pic no.	Manders::Manders	Pic no.	Manders::Manders	Pic no.	Manders::Manders	Pic no.	Manders::Manders
1	0.61276	1a	0.50097	1	0.61276	1a	0.50097				1a	0.34839	1a	0.718	1	0.59017	1a	0.62235
2a	0.65327	1b	0.55605	2a	0.65327	1b	0.55605				1b	0.37589	1b	0.34287	2a	0.47594	1b	0.51441
2b	0.66153	1c	0.48647	2b	0.66153	1c	0.48647				2a	0.41653	1c	0.44779	2b	0.39257	2a	0.6104
2c	0.61982	2	0.59862	2c	0.61982	2	0.59862				2b	0.34594	2a	0.46242	3	0.38647	2b	0.49663
3	0.557	3a	0.29686	3	0.557	3a	0.29686				3	0.31117	2b	0.39584	4a	0.37485	3a	0.59371
4a	0.55046	3b	0.50659	4a	0.55046	3b	0.50659				4a	0.47792	3a	0.25681	4b	0.4896	3b	0.51144
4b	0.58444	5a	0.47642	4b	0.58444	5a	0.47642				4b	0.42663	3b	0.44876	4c	0.38934	4a	0.54139
4c	0.50467	5b	0.40814	4c	0.50467	5b	0.40814				4c	0.50669	3c	0.51279	5a	0.62709	4b	0.42507
4d	0.56703	5c	0.54591	4d	0.56703	5c	0.54591				5a	0.49246	4	0.51851	5b	0.30135	4c	0.68508
5a	0.57784	4a	0.51423	5a	0.57784	4a	0.51423				5b	0.33521	5a	0.65105	6	0.60021	4d	0.46578
5b	0.63267	4b	0.79553	5b	0.63267	4b	0.79553				6a	0.50998	5b	0.37965	7a	0.27825	5	0.53739
5c	0.58142	4c	0.55989	5c	0.58142	4c	0.55989				6b	0.41755	6a	0.33192	7b	0.33884	6a	0.40051
5d	0.65431	6a	0.54655	5d	0.65431	6a	0.54655				6c	0.6801	6b	0.26145	8	0.38144	6b	0.49121
6a	0.70318	6b	0.64661	6a	0.70318	6b	0.64661				7	0.47288	7a	0.24313	9a	0.47308	6c	0.36081
6b	0.505	6c	0.59554	6b	0.505	6c	0.59554				8	0.72775	7b	0.37486	9b	0.36811	7	0.54985
6c	0.55234	6d	0.54494	6c	0.55234	6d	0.54494				9a	0.47881	8a	0.6548	10a	0.40298	8a	0.55029
4hpi
Rep 1											Rep 2
MP4				MP4-97R/167G							MP4				MP4-97R/167G
Mock		HCQ treated		Mock		HCQ treated					Mock		HCQ treated		Mock		HCQ treated
Pic no.	Manders::Manders	Pic no.	Manders::Manders	Pic no.	Manders::Manders	Pic no.	Manders::Manders				Pic no.	Manders::Manders	Pic no.	Manders::Manders	Pic no.	Manders::Manders	Pic no.	Manders::Manders
2	0.61819	2	0.46312	1	0.9294	12	0.63164				1	0.51542	1	0.60431	1a	0.59633	1a	0.48926
13	0.48248	3	0.55064	4	0.88523	13	0.31857				2a	0.44645	2a	0.57873	1b	0.56934	1b	0.54743
14	0.47192	4	0.4733	5	0.95959	14	0.68871				2b	0.51771	2b	0.72574	2a	0.63209	2	0.73151
10a	0.62737	9	0.49553	12	0.77281	15	0.53963				3a	0.59298	2c	0.70771	2b	0.78783	3a	0.49654
10b	0.59646	15	0.58488	13	0.71396	17	0.72876				3b	0.73088	3a	0.50489	3	0.45091	3b	0.38695
11a	0.39344	11a	0.50873	14	0.92156	18	0.78669				3c	0.58474	3b	0.77668	4	0.66387	4	0.40535
11b	0.61608	11b	0.61053	15	0.79814	19	0.65618				4	0.5432	4a	0.48759	5	0.60399	5	0.60729
12a	0.49206	11c	0.48695	16	0.83069	20	0.62037				5a	0.60523	4b	0.60701	6a	0.49683	6	0.62575
12b	0.49221	11d	0.4944	18	0.59238	21	0.66106				5b	0.63716	5a	0.75189	6b	0.45691	7	0.42096
12c	0.40959	12a	0.56605	19	0.87846	22	0.49342				5c	0.61734	5b	0.68336	7	0.6974	8	0.58065
13b	0.49126	12b	0.45408	20	0.82304	23	0.55996				6	0.54319	5c	0.64469	8	0.67878	9	0.47688
13c	0.56644	12c	0.51324	23	0.82631	24	0.67772				7	0.52933	5d	0.62813	9a	0.66787	10	0.43571
15a	0.4938	13a	0.75518	17a	0.83757	25	0.87133				8a	0.55894	6	0.60294	9b	0.60931	11	0.52111
15b	0.42159	13b	0.55851	17b	0.8258	26	0.69416				8b	0.55373	7	0.52313	10a	0.66808	12	0.55803
15c	0.58186	14a	0.49718	21a	0.91158	1a	0.82212				9	0.49133	8	0.66894	10b	0.73575	13	0.56861
16a	0.56349	14b	0.54735	21b	0.50558	1b	0.84746				10	0.56763	9	0.67511	11a	0.6405	14	0.45399
