# Supplementary material for: Virus adaptation to heparan sulfate comes with capsid stability tradeoff
Source: eLife. 2024 Dec 23;13:e98441. doi: 10.7554/eLife.98441 (PMC11717363; doi:10.7554/eLife.98441)
Supplement: Figure 4—source data 1. [file elife-98441-fig4-data1.xlsx]

## Sheet: Fig 4D
20230824 Rep 1						20230825 Rep 2						20230908 Rep 3
Group	Rab5a	% Positive Cells	avg % positive cells	Normalise to avg WT-transfected cells		Group	Rab5a	% Positive Cells		Normalise to avg WT-transfected cells		Group	Rab5a	% Positive Cells		Normalise to avg WT-transfected cells
MP4/97R/167G	WT	62.6374	65.751	94.7478		MP4/97R/167G	WT	75.4579	74.9036	107.937		MP4/97R/167G	WT	66.6473	67.5327	97.3154
		68.8645						74.3494						68.4182
	CA	72.9167	69.9662	100.822			CA	69.9422	73.5787	106.028			CA	65.9259	67.0979	96.6888
		67.0157						77.2152						68.27
	DN	62.6866	56.0421	80.7572			DN	71.7949	69.037	99.483			DN	52.2831	58.1591	83.8078
		49.3976						66.2791						64.0351
MP4	WT	41.7582	43.1419	90.3055		MP4	WT	52.8112	52.1366	109.134		MP4	WT	46.7903	48.0412	100.561
		44.5255						51.462						49.2921
	CA	29.4498	30.4015	63.637			CA	28.9063	28.1551	58.9348			CA	28.0021	30.5459	63.9395
		31.3531						27.4038						33.0898
	DN	48.1481	43.3048	90.6466			DN	53.125	53.4856	111.957			DN	40.868	41.3823	86.6224
		38.4615						53.8462						41.8966
AVG WT positive cells
MP4/97R/167G	69.3958
MP4	47.7732
