# Supplementary material for: Virus adaptation to heparan sulfate comes with capsid stability tradeoff
Source: eLife. 2024 Dec 23;13:e98441. doi: 10.7554/eLife.98441 (PMC11717363; doi:10.7554/eLife.98441)
Supplement: Figure 5—source data 1. [file elife-98441-fig5-data1.xlsx]

## Sheet: Sheet1
vero						vero						vero
Rep 1						Rep 2						Rep 3
read on 20230403						read on 20230414						read on 20230413
Group	Temperature	% positive cells	avg % positive cells	relative to 4C		Group	Temperature	% positive cells	avg % positive cells	relative to 4C		Group	Temperature	% positive cells	avg % positive cells	relative to 4C
MP4/97R/167G	4C	36.4658	44.925	100		MP4/97R/167G	4C	53.6786	55.2854	100		MP4/97R/167G	4C	27.775	38.102	100
		53.3842						56.8921						48.4289
	37C	41.2959	42.1334	93.7861			37C	53.227	54.4252	98.4442			37C	31.7204	37.773	99.1365
		42.9709						55.6234						43.8255
	45C	37.2208	41.6703	92.7553			45C	47.3871	47.5566	86.0202			45C	24.3235	29.2421	76.747
		46.1198						47.726						34.1607
	50C	21.6674	21.5457	47.9593			50C	16.795	16.9936	30.738			50C	21.709	23.7768	62.4031
		21.424						17.1922						25.8446
	55C	0.00768521	0.0371982	0.0828006			55C	0.00708165	0.032433	0.0586648			55C	0.0087321	0.0155309	0.0407614
		0.0667111						0.0577844						0.0223297
MP4	4C	63.9795	57.5508	100		MP4	4C	73.3358	77.2583	100		MP4	4C	67.6034	74.1547	100
		51.1222						81.1807						80.706
	37C	50.44	53.9455	93.7355			37C	78.4452	79.2849	102.623			37C	68.8346	71.6428	96.6127
		57.4511						80.1245						74.4511
	45C	53.7211	57.8425	100.507			45C	78.9967	77.3004	100.054			45C	67.7172	67.2015	90.6235
		61.9639						75.604						66.6859
	50C	42.5699	48.3599	84.0299			50C	56.0363	56.6292	73.2986			50C	56.1182	60.3531	81.3881
		54.15						57.2222						64.588
	55C	2.30601	3.67239	6.38112			55C	2.46243	2.59263	3.3558			55C	3.75287	2.88184	3.88625
		3.67239						2.59263						2.88184
