# Supplementary material for: Virus adaptation to heparan sulfate comes with capsid stability tradeoff
Source: eLife. 2024 Dec 23;13:e98441. doi: 10.7554/eLife.98441 (PMC11717363; doi:10.7554/eLife.98441)
Supplement: Figure 5—source data 2. [file elife-98441-fig5-data2.xlsx]

## Sheet: Sheet1
Rep 1					Rep 2						Rep 3
	% Positive Cells	avg % positive cells	% relative to nontreated			% Positive Cells	avg % positive cells					% Positive Cells	avg % positive cells
MP4/97R/167G	52.302	54.8657	100		MP4/97R/167G	54.3341	50.1442	100			MP4/97R/167G	15.516	23.4295	100
	57.4294					45.9543						31.3431
MP4/97R/167G 1ug SCARB2	29.9984	29.2706	53.3496		MP4/97R/167G 1ug SCARB2	31.724	31.5069	62.8327			MP4/97R/167G 1ug SCARB2	6.93741	11.4003	48.6578
	28.5429					31.2899						15.8632
MP4	70.179	69.1583	100		MP4	69.4572	68.7785	100			MP4	23.5686	37.8036	100
	68.1375					68.0998						52.0385
MP4 1ug SCARB2	67.0338	65.9826	95.4081		MP4 1ug SCARB2	65.9689	66.5473	96.7559			MP4 1ug SCARB2	33.2077	44.9352	118.865
	64.9313					67.1256						56.6626
