# Supplementary material for: Virus adaptation to heparan sulfate comes with capsid stability tradeoff
Source: eLife. 2024 Dec 23;13:e98441. doi: 10.7554/eLife.98441 (PMC11717363; doi:10.7554/eLife.98441)
Supplement: Figure 6—figure supplement 1—source data 1. [file elife-98441-fig6-figsupp1-data1.xlsx]

## Sheet: Sheet1
Rep 1
		Total cells			Positive cells			%positive cells			avg % positive cells	% positive cells relative to triplicate nontreated
EV71-97R/167G	nontreated	2511	2341	2405	302	281	298	12.0271	12.0034	12.3909	12.1405	86.2433
	HCQ	441	393	419	180	201	184	40.8163	51.145	43.9141	45.2918	321.744
EV71-97L	nontreated	1607	1550	1352	538	657	546	33.4785	42.3871	40.3846	38.7501	98.0326
	HCQ	2347	2385	2239	317	371	370	13.5066	15.5556	16.5252	15.1958	38.4434
Rep 2
		Total cells			Positive cells			%positive cells			avg % positive cells	% positive cells relative to nontreated
EV71-97R/167G	nontreated	1746	2145	2133	248	400	377	14.2039	18.648	17.6746	16.8422	119.644
	HCQ	431	331	346	122	115	126	28.3063	34.7432	36.4162	33.1552	235.528
EV71-97L	nontreated	1131	1125	1000	453	448	391	40.0531	39.8222	39.1	39.6584	100.331
	HCQ	1693	2100	2142	241	484	316	14.2351	23.0476	14.7526	17.3451	43.8808
Rep 3
		Total cells			Positive cells			%positive cells			avg % positive cells	% positive cells relative to nontreated
EV71-97R/167G	nontreated	1936	2095	1881	227	303	255	11.7252	14.463	13.5566	13.2483	94.1131
	HCQ	322	286	265	114	86	89	35.4037	30.0699	33.5849	33.0195	234.564
EV71-97L	nontreated	1165	1068	1213	409	428	550	35.1073	40.0749	45.3421	40.1748	101.637
	HCQ	2294	2008	2265	302	244	436	13.1648	12.1514	19.2494	14.8552	37.5817
	triplicate nontreated		EV71-97R/167G	14.077
			EV71-97L	39.5278
