# Supplementary material for: Virus adaptation to heparan sulfate comes with capsid stability tradeoff
Source: eLife. 2024 Dec 23;13:e98441. doi: 10.7554/eLife.98441 (PMC11717363; doi:10.7554/eLife.98441)
Supplement: Figure 6—source data 1. [file elife-98441-fig6-data1.xlsx]

## Sheet: Sheet1
Rep 1					Rep 2					Rep 3				triplicate avg
	% Positive Cells	AVG % positive cells				% Positive Cells					% Positive Cells
145Q	30.5852	32.9657			145Q	29.4501	35.7443			145Q	38.116	33.513		145Q	34.0744
	35.3463					42.0386					28.91
145Q 25uM HCQ	46.3324	51.2836			145Q 25uM HCQ	37.0877	52.0123			145Q 25uM HCQ	58.3387	56.6728
	56.2348					66.937					55.0069
145E	69.4417	59.6235			145E	42.3644	50.7335			145E	78.646	69.2571		145E	59.8714
	49.8054					59.1026					59.8682
145E 25uM HCQ	19.492	19.0379			145E 25uM HCQ	20.845	24.8514			145E 25uM HCQ	32.46	30.367
	18.5838					28.8579					28.274
calculate % to nontreated
145Q		96.7465					104.901					98.3525
145Q 25uM HCQ		150.505					152.644					166.321
145E		99.5861					84.7375					115.676
145E 25uM HCQ		31.798					41.5081					50.7204
