# Supplementary material for: Virus adaptation to heparan sulfate comes with capsid stability tradeoff
Source: eLife. 2024 Dec 23;13:e98441. doi: 10.7554/eLife.98441 (PMC11717363; doi:10.7554/eLife.98441)
Supplement: Figure 6—source data 2. [file elife-98441-fig6-data2.xlsx]

## Sheet: Sheet1
vero						vero						vero
Rep 1						Rep 2						Rep 3
read on 20231218						read on 20231218						read on 20231218
Group	Temperature	% positive cells	avg % positive cells	relative to 4C		Group	Temperature	% positive cells	avg % positive cells	relative to 4C		Group	Temperature	% positive cells	avg % positive cells	relative to 4C
145Q	4C	36.2301	39.5944	100		145Q	4C	42.0749	47.4947	100		145Q	4C	37.337	37.239	100
		42.9588						52.9144						37.1409
	37C	34.7411	34.7682	87.8107			37C	44.4707	42.8014	90.1184			37C	40.2409	41.1998	110.636
		34.7952						41.1321						42.1586
	45C	35.2329	35.858	90.5632			45C	40.6157	45.2636	95.3026			45C	40.4915	39.4837	106.028
		36.4831						49.9116						38.4759
	50C	29.5857	30.2737	76.4595			50C	37.4284	29.3943	61.8897			50C	36.056	32.5138	87.3113
		30.9617						21.3602						28.9716
	55C	10.6863	11.6688	29.4709			55C	5.54973	4.17792	8.7966			55C	1.03774	1.70945	4.59049
		12.6514						2.8061						2.38116
145E	4C	68.9725	67.96	100		145E	4C	66.613	65.913	100		145E	4C	75.7186	75.7621	100
		66.9476						65.2131						75.8057
	37C	63.8308	63.8128	93.8974			37C	75.823	74.718	113.358			37C	66.9561	63.9703	84.4357
		63.7947						73.6129						60.9845
	45C	69.9812	68.1226	100.239			45C	56.6229	64.7285	98.2029			45C	67.5459	68.2891	90.1362
		66.264						72.8342						69.0323
	50C	65.3638	64.3521	94.6911			50C	67.9638	71.992	109.223			50C	76.4151	70.891	93.5704
		63.3404						76.0201						65.3668
	55C	51.1674	51.5775	75.8939			55C	44.9319	47.4889	72.0478			55C	38.7624	32.5968	43.0252
		51.5775						47.4889						32.5968
