# Supplementary material for: Virus adaptation to heparan sulfate comes with capsid stability tradeoff
Source: eLife. 2024 Dec 23;13:e98441. doi: 10.7554/eLife.98441 (PMC11717363; doi:10.7554/eLife.98441)
Supplement: Figure 6—source data 3. [file elife-98441-fig6-data3.xlsx]

## Sheet: Sheet1
Rep 1					Rep 2					Rep3
	% Positive Cells	AVG % positive cells	% relative to nontreated			% Positive Cells	AVG % positive cells				% Positive Cells	AVG % positive cells
145Q	28.2869	27.9425	100		145Q	33.9813	37.3631	100		145Q	34.1528	31.9361	100
	27.5982					40.7449					29.7193
145Q 1ug SCARB2	12.0391	13.6505	48.8522		145Q 1ug SCARB2	18.9393	17.5176	46.8849		145Q 1ug SCARB2	9.15682	9.18621	28.7644
	15.262					16.096					9.21559
145E	47.4431	44.7408	100		145E	47.3	52.0691	100		145E	56.398	54.9149	100
	42.0385					56.8382					53.4317
145E 1ug SCARB2	35.237	39.966	89.328		145E 1ug SCARB2	54.3682	53.5618	102.867		145E 1ug SCARB2	60.0148	55.3678	100.825
	44.6951					52.7554					50.7208
